# Supplementary material for: Combined effects of grain size, flow volume and channel width on geophysical flow mobility: 3-D discrete element modeling of dry and dense flows of angular rock fragments
Source: Copernicus journal article supplement (doi:10.5194/se-2016-79), 2016-06-08
Supplement: Supplementary file [file se-2016-79-AC2-supplement.pdf]

Scheidegger,1973:

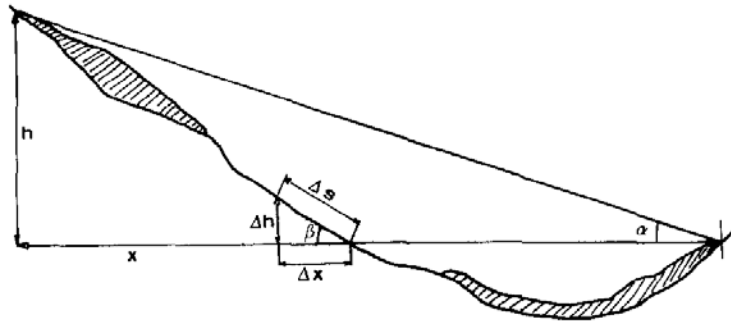

Fig. 1. Geometry of a landslide  
Geometrie eines Bergsturzes  
Géometrie d'un éboulement

Scheidegger,1973:

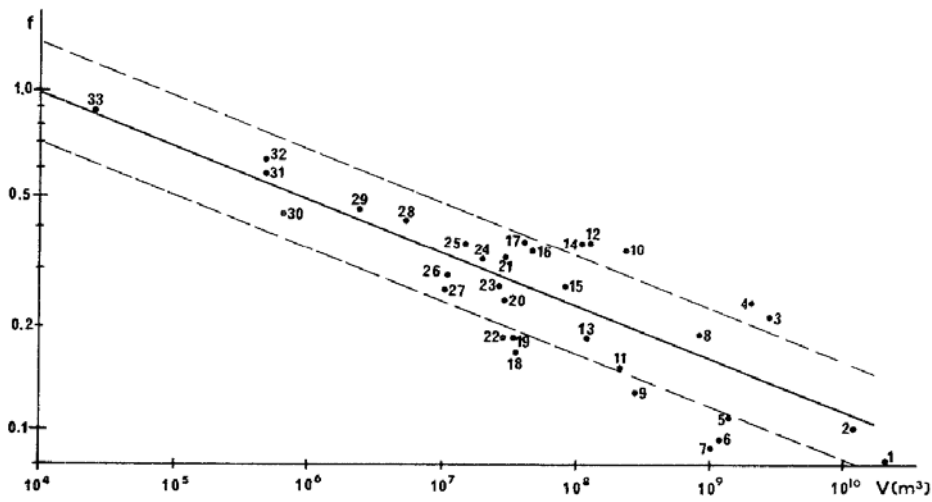

Fig. 2. Correlation between landslide volume  $V$  (in  $m^3$ ) and the coefficient of friction  $f$ .
